# Supplementary material for: Identification and characterization of Gypsophila paniculata color morphs in Sleeping Bear Dunes National Lakeshore, MI, USA
Source: PeerJ journal article supplement (doi:10.7717/peerj.7100), 2019-06-17
Supplement: Fig_S2.pdf [file Fig_S2.pdf]

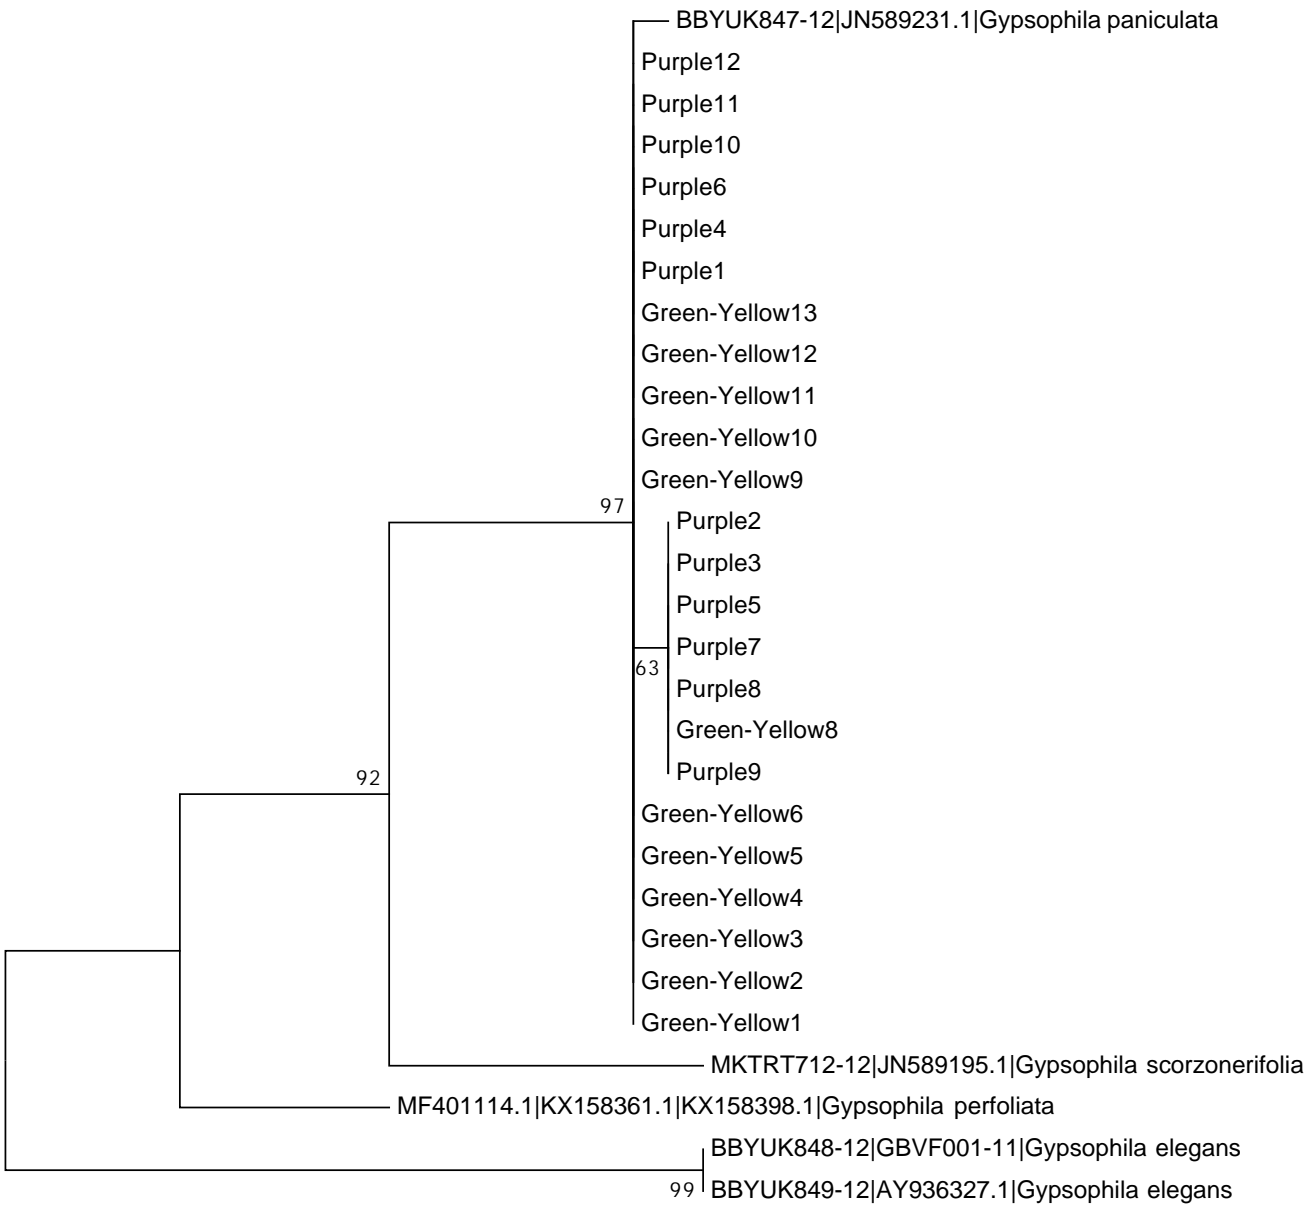

5
